# Supplementary material for: Mesophotic gorgonian corals evolve multiple times and faster than deep and shallow lineages
Source: bioRxiv or medRxiv preprint supplement (doi:10.1101/2020.12.17.422867), 2021-10-14
Supplement: Supplementary file [file media-1.pdf]

**Supplementary Table 1S.** Metadata from sequences used in the study.

| <b>GenBank ACC No.</b>                                                                      | <b>Type</b> | <b>Depth</b> | <b>Species</b>                | <b>Specimen_voucher</b> | <b>Country</b> |
|---------------------------------------------------------------------------------------------|-------------|--------------|-------------------------------|-------------------------|----------------|
| <i>New sequences generated for this study (D=deep-water; M=mesophotic; S=shallow-water)</i> |             |              |                               |                         |                |
| MN046063                                                                                    | M           | 60m          | <i>Antillogorgia hystrix</i>  | ANDES-IM 4262           | Colombia       |
| MN046092                                                                                    | M           | 45m          | <i>Antillogorgia</i> sp.      | ANDES-IM 4459           | Colombia       |
| MN046093                                                                                    | M           | 45m          | <i>Antillogorgia</i> sp.      | ANDES-IM 4461           | Colombia       |
| MN046016                                                                                    | M           | 37m          | <i>Caliacis nutans</i>        | ANDES-IM 4661           | Colombia       |
| MN046020                                                                                    | M           | 35m          | <i>Caliacis nutans</i>        | ANDES-IM 4658           | Colombia       |
| MN046023                                                                                    | M           | 80m          | <i>Caliacis nutans</i>        | ANDES-IM 4347           | Colombia       |
| MN046027                                                                                    | M           | 80m          | <i>Caliacis nutans</i>        | ANDES-IM 4348           | Colombia       |
| MN046072                                                                                    | M           | 95m          | <i>Caliacis nutans</i>        | ANDES-IM 4801           | Colombia       |
| MN046075                                                                                    | M           | 95m          | <i>Caliacis nutans</i>        | ANDES-IM 4645           | Colombia       |
| MN046017                                                                                    | M           | 37m          | <i>Ctenocella barbadensis</i> | ANDES-IM 4146           | Colombia       |
| MN046035                                                                                    | M           | 80m          | <i>Ctenocella barbadensis</i> | ANDES-IM 4132           | Colombia       |
| MN046082                                                                                    | M           | 90m          | <i>Ctenocella barbadensis</i> | ANDES-IM 4139           | Colombia       |
| MN046085                                                                                    | M           | 85m          | <i>Ctenocella barbadensis</i> | ANDES-IM 4500           | Colombia       |
| MN046088                                                                                    | M           | 85m          | <i>Ctenocella barbadensis</i> | ANDES-IM 4143           | Colombia       |
| MN046021                                                                                    | M           | 45m          | <i>Diodogorgia nodulifera</i> | ANDES-IM 4368           | Colombia       |
| MN046041                                                                                    | M           | 72m          | <i>Diodogorgia nodulifera</i> | ANDES-IM 4795           | Colombia       |
| MN046042                                                                                    | M           | 72m          | <i>Diodogorgia nodulifera</i> | ANDES-IM 4796           | Colombia       |
| MN046050                                                                                    | M           | 72m          | <i>Diodogorgia nodulifera</i> | ANDES-IM 4366           | Colombia       |
| MN046052                                                                                    | M           | 72m          | <i>Diodogorgia nodulifera</i> | ANDES-IM 4367           | Colombia       |
| MN046053                                                                                    | M           | 72m          | <i>Diodogorgia nodulifera</i> | ANDES-IM 4797           | Colombia       |
| MN046018                                                                                    | M           | 37m          | <i>Ellisella nivea</i>        | ANDES-IM 4363           | Colombia       |
| MN046019                                                                                    | M           | 37m          | <i>Ellisella nivea</i>        | ANDES-IM 4365           | Colombia       |
| MN046083                                                                                    | M           | 90m          | <i>Ellisella schmitti</i>     | ANDES-IM 4440           | Colombia       |
| MN046101                                                                                    | M           | 50m          | <i>Ellisella schmitti</i>     | ANDES-IM 4439           | Colombia       |
| MN046074                                                                                    | M           | 95m          | <i>Ellisella</i> sp.          | ANDES-IM 4497           | Colombia       |
| MN046073                                                                                    | M           | 95m          | <i>Ellisella</i> sp3          | ANDES-IM 4800           | Colombia       |
| MN046013                                                                                    | M           | 60m          | <i>Ellisella</i> sp4          | ANDES-IM 4494           | Colombia       |
| MN046014                                                                                    | M           | 60m          | <i>Ellisella</i> sp4          | ANDES-IM 4495           | Colombia       |
| MN046079                                                                                    | M           | 115m         | <i>Ellisella</i> sp7          | ANDES-IM 4498           | Colombia       |
| MN046081                                                                                    | M           | 115m         | <i>Ellisella</i> sp7          | ANDES-IM 4499           | Colombia       |
| MN046059                                                                                    | M           | 80m          | <i>Eunicea pinta</i>          | ANDES-IM 4409           | Colombia       |
| MN046062                                                                                    | M           | 60m          | <i>Eunicea pinta</i>          | ANDES-IM 4410           | Colombia       |
| MN046094                                                                                    | M           | 45m          | <i>Eunicea pinta</i>          | ANDES-IM 4406           | Colombia       |
| MN046045                                                                                    | M           | 72m          | <i>Hypnogorgia pendula</i>    | ANDES-IM 4620           | Colombia       |
| MN046049                                                                                    | M           | 72m          | <i>Hypnogorgia pendula</i>    | ANDES-IM 4624           | Colombia       |
| MN046056                                                                                    | M           | 80m          | <i>Hypnogorgia pendula</i>    | ANDES-IM 4369           | Colombia       |
| MN046057                                                                                    | M           | 80m          | <i>Hypnogorgia pendula</i>    | ANDES-IM 4639           | Colombia       |
| MN046058                                                                                    | M           | 80m          | <i>Hypnogorgia pendula</i>    | ANDES-IM 4640           | Colombia       |
| MN046060                                                                                    | M           | 80m          | <i>Hypnogorgia pendula</i>    | ANDES-IM 4641           | Colombia       |
| MN046061                                                                                    | M           | 80m          | <i>Hypnogorgia pendula</i>    | ANDES-IM 4370           | Colombia       |
| MN046069                                                                                    | M           | 95m          | <i>Hypnogorgia pendula</i>    | ANDES-IM 4371           | Colombia       |

|          |   |      |                            |               |          |
|----------|---|------|----------------------------|---------------|----------|
| MN046070 | M | 95m  | <i>Hypnogorgia pendula</i> | ANDES-IM 4644 | Colombia |
| MN046031 | M | 80m  | <i>Hypnogorgia</i> sp.     | ANDES-IM 4633 | Colombia |
| MN046033 | M | 80m  | <i>Hypnogorgia</i> sp.     | ANDES-IM 4634 | Colombia |
| MN046080 | M | 115m | <i>Hypnogorgia</i> sp.     | ANDES-IM 4372 | Colombia |
| MN046084 | M | 85m  | <i>Hypnogorgia</i> sp.     | ANDES-IM 4646 | Colombia |
| MN046051 | M | 72m  | <i>Leptogorgia</i> sp.     | ANDES-IM 4504 | Colombia |
| MN046096 | M | 50m  | <i>Leptogorgia</i> sp3     | ANDES-IM 4505 | Colombia |
| MN046097 | M | 50m  | <i>Leptogorgia</i> sp3     | ANDES-IM 4506 | Colombia |
| MN046028 | M | 80m  | <i>Lytrelia plana</i>      | ANDES-IM 4421 | Colombia |
| MN046032 | M | 80m  | <i>Lytrelia plana</i>      | ANDES-IM 4422 | Colombia |
| MN046036 | M | 77m  | <i>Lytrelia plana</i>      | ANDES-IM 4629 | Colombia |
| MN046038 | M | 77m  | <i>Lytrelia plana</i>      | ANDES-IM 4418 | Colombia |
| MN046039 | M | 77m  | <i>Lytrelia plana</i>      | ANDES-IM 4476 | Colombia |
| MN046043 | M | 72m  | <i>Lytrelia plana</i>      | ANDES-IM 4605 | Colombia |
| MN046044 | M | 66m  | <i>Lytrelia plana</i>      | ANDES-IM 4513 | Colombia |
| MN046054 | M | 72m  | <i>Lytrelia plana</i>      | ANDES-IM 4475 | Colombia |
| MN046095 | M | 85m  | <i>Lytrelia plana</i>      | ANDES-IM 4802 | Colombia |
| MN046098 | M | 50m  | <i>Lytrelia plana</i>      | ANDES-IM 4511 | Colombia |
| MN046100 | M | 50m  | <i>Lytrelia plana</i>      | ANDES-IM 4512 | Colombia |
| MN046091 | M | 45m  | <i>Muricea laxa</i>        | ANDES-IM 4794 | Colombia |
| MN046022 | M | 80m  | <i>Nicella goreau</i>      | ANDES-IM 4212 | Colombia |
| MN046026 | M | 80m  | <i>Nicella goreau</i>      | ANDES-IM 4213 | Colombia |
| MN046029 | M | 80m  | <i>Nicella goreau</i>      | ANDES-IM 4522 | Colombia |
| MN046030 | M | 80m  | <i>Nicella goreau</i>      | ANDES-IM 4214 | Colombia |
| MN046034 | M | 80m  | <i>Nicella goreau</i>      | ANDES-IM 4215 | Colombia |
| MN046076 | M | 115m | <i>Nicella goreau</i>      | ANDES-IM 4655 | Colombia |
| MN046077 | M | 115m | <i>Nicella goreau</i>      | ANDES-IM 4219 | Colombia |
| MN046086 | M | 85m  | <i>Nicella goreau</i>      | ANDES-IM 4220 | Colombia |
| MN046089 | M | 85m  | <i>Nicella goreau</i>      | ANDES-IM 4221 | Colombia |
| MN046025 | M | 80m  | <i>Nicella</i> sp1         | ANDES-IM 4521 | Colombia |
| MN046099 | M | 50m  | <i>Nicella</i> sp1         | ANDES-IM 4519 | Colombia |
| MN046055 | M | 87m  | <i>Scleracis</i> sp.       | ANDES-IM 4626 | Colombia |
| MN046047 | M | 72m  | <i>Scleracis</i> sp.       | ANDES-IM 4622 | Colombia |
| MN046037 | M | 77m  | <i>Swiftia exserta</i>     | ANDES-IM 4609 | Colombia |
| MN046071 | M | 95m  | <i>Swiftia exserta</i>     | ANDES-IM 4193 | Colombia |
| MN046078 | M | 115m | <i>Swiftia exserta</i>     | ANDES-IM 4194 | Colombia |
| MN046040 | M | 72m  | <i>Thelogorgia studeri</i> | ANDES-IM 4615 | Colombia |
| MN046064 | M | 67m  | <i>Thelogorgia studeri</i> | ANDES-IM 4665 | Colombia |
| MN046065 | M | 95m  | <i>Thelogorgia studeri</i> | ANDES-IM 4666 | Colombia |
| MN046067 | M | 95m  | <i>Thelogorgia studeri</i> | ANDES-IM 4667 | Colombia |
| MN046068 | M | 95m  | <i>Thelogorgia studeri</i> | ANDES-IM 4668 | Colombia |
| MN046090 | M | 85m  | <i>Thelogorgia studeri</i> | ANDES-IM 4670 | Colombia |
| MN046102 | M | 50m  | <i>Thelogorgia studeri</i> | ANDES-IM 4664 | Colombia |
| MN046046 | M | 72m  | <i>Thesea</i> sp.          | ANDES-IM 4621 | Colombia |
| MN046066 | M | 95m  | <i>Thesea</i> sp1          | ANDES-IM 4643 | Colombia |

|          |   |     |                          |               |          |
|----------|---|-----|--------------------------|---------------|----------|
| MN046087 | M | 85m | <i>Thesea</i> sp3        | ANDES-IM 4647 | Colombia |
| MN046024 | M | 80m | <i>Trichogorgia lyra</i> | ANDES-IM 4342 | Colombia |
| MN046103 | M | 50m | <i>Trichogorgia lyra</i> | ANDES-IM 4653 | Colombia |
| MN046048 | M | 72m | Unknown octocoral        | ANDES-IM 4617 | Colombia |
| MN046015 | M | 60m | <i>Verrucella</i> sp.    | ANDES-IM 4654 | Colombia |

*Sequences obtained from GenBank*

|            |   |  |                                   |
|------------|---|--|-----------------------------------|
| DQ297418   | D |  | <i>Acanthogorgia angustiflora</i> |
| GU563300   | D |  | <i>Acanthogorgia armata</i>       |
| JQ241248   | D |  | <i>Acanthogorgia aspera</i>       |
| KC984589   | D |  | <i>Acanthogorgia aspera</i>       |
| GQ342464   | D |  | <i>Acanthogorgia breviflora</i>   |
| KC984581   | D |  | <i>Acanthogorgia</i> sp1          |
| KF856064   | D |  | <i>Acanthogorgia spissa</i>       |
| JQ241245   | D |  | <i>Alcyonacea</i> sp.             |
| KC984603   | D |  | <i>Anthomastus grandiflorus</i>   |
| KC984604   | D |  | <i>Anthomastus robustus</i>       |
| KC984584   | D |  | <i>Anthothela</i> sp1             |
| KC984580   | D |  | <i>Anthothela</i> sp2             |
| KC984592   | D |  | <i>Anthothela</i> sp3             |
| KM272741.1 | S |  | <i>Antillogorgia hystrix</i>      |
| KC984595   | D |  | <i>Aquaumbridae</i> sp.           |
| KC984594   | D |  | <i>Aquaumbridae</i> sp1           |
| KC771876   | D |  | <i>Callogorgia americana</i>      |
| KC771720   | D |  | <i>Callogorgia delta</i>          |
| KC771845   | D |  | <i>Callogorgia gracilis</i>       |
| KC788274   | D |  | <i>Chelidonisis mexicana</i>      |
| KC788265   | D |  | <i>Chrysogorgia averta</i>        |
| KC788268   | D |  | <i>Chrysogorgia</i> sp.           |
| KC984578   | D |  | <i>Chrysogorgia</i> sp1b          |
| JQ241252   | D |  | <i>Clavularia rudis</i>           |
| KC984597   | D |  | <i>Clavularia rudis</i>           |
| KC788267   | D |  | <i>Corallium niobe</i>            |
| KC788270   | D |  | <i>Corallium</i> sp1              |
| AY533651.1 | M |  | <i>Ctenocella barbadensis</i>     |
| KF803673   | M |  | <i>Ctenocella barbadensis</i>     |
| KF803674   | M |  | <i>Ctenocella barbadensis</i>     |
| KF803675   | M |  | <i>Ctenocella barbadensis</i>     |
| JN227995   | M |  | <i>Ctenocella schmitti</i>        |
| KC984601   | D |  | <i>Echinomuricea</i> sp.          |
| KF803677   | M |  | <i>Ellisella schmitti</i>         |
| JN227994   | M |  | <i>Ellisella</i> sp.              |
| KF803678   | M |  | <i>Ellisella</i> sp.              |
| KF803679   | M |  | <i>Ellisella</i> sp.              |
| KF803683   | M |  | <i>Ellisella</i> sp.              |
| KF803685   | M |  | <i>Ellisella</i> sp.              |

|            |   |                                   |
|------------|---|-----------------------------------|
| KF803686   | M | <i>Ellisella</i> sp.              |
| KF803687   | M | <i>Ellisella</i> sp.              |
| JX203793   | M | <i>Ellisella</i> sp2              |
| KF915611   | M | <i>Ellisella</i> spA              |
| KF915612   | M | <i>Ellisella</i> spA              |
| JN866557.1 | M | <i>Eugorgia rubens</i>            |
| LT221096   | M | <i>Eugorgia siedenburgae</i>      |
| AY683057.1 | S | <i>Eunicea asperula</i>           |
| AY683058   | S | <i>Eunicea clavigera</i>          |
| AY126407   | S | <i>Eunicea fusca</i>              |
| AY126404   | S | <i>Eunicea knighti</i>            |
| KP772633   | S | <i>Eunicea laciniata</i>          |
| AY683052   | S | <i>Eunicea laxispica</i>          |
| KP772634   | S | <i>Eunicea pallida</i>            |
| AY126405   | S | <i>Eunicea</i> sp.                |
| AY683053   | S | <i>Eunicea succinea</i>           |
| AY126406   | S | <i>Eunicea tourneforti</i>        |
| JQ397293   | M | <i>Eunicella singularis</i>       |
| JQ397295   | M | <i>Eunicella singularis</i>       |
| JQ397296   | M | <i>Eunicella singularis</i>       |
| JQ397297   | M | <i>Eunicella singularis</i>       |
| JQ397298   | M | <i>Eunicella singularis</i>       |
| JQ397299   | M | <i>Eunicella singularis</i>       |
| AY126427   | S | <i>Gorgonia flabellum</i>         |
| AY126425   | S | <i>Gorgonia ventalina</i>         |
| GQ143805.1 | S | <i>Heterogorgia hickmani</i>      |
| GQ143807.1 | S | <i>Heterogorgia verrucosa</i>     |
| DQ302844   | S | <i>Iciligorgia</i> sp.            |
| KC788263   | D | <i>Iridogorgia magnispiralis</i>  |
| KC788271   | D | <i>Iridogorgia splendens</i>      |
| KC788264   | D | <i>Keratoisidinae</i> sp.         |
| KC788266   | D | <i>Keratoisidinae</i> sp.         |
| KC788275   | D | <i>Keratoisidinae</i> sp.         |
| KC984572   | D | <i>Keratoisidinae</i> sp.         |
| KC984574   | D | <i>Keratoisidinae</i> sp.         |
| KC984575   | D | <i>Keratoisidinae</i> sp.         |
| KC984576   | D | <i>Keratoisidinae</i> sp.         |
| KC984577   | D | <i>Keratoisidinae</i> sp.         |
| KX767324   | M | <i>Leptogorgia alba</i>           |
| AY268459.1 | S | <i>Leptogorgia hebes</i>          |
| KX767322.1 | S | <i>Leptogorgia ramulus</i>        |
| AY126418   | S | <i>Leptogorgia virgulata</i>      |
| GQ342520   | S | <i>Muricea atlantica</i>          |
| HG917016   | S | <i>Muricea</i> cf. <i>austera</i> |
| NC029697.1 | S | <i>Muricea crassa</i>             |

|            |   |                                    |
|------------|---|------------------------------------|
| AY683063   | S | <i>Muricea elongata</i>            |
| HG917017.1 | S | <i>Muricea fruticosa</i>           |
| AY683064   | S | <i>Muricea laxa</i>                |
| AY683065   | S | <i>Muricea muricata</i>            |
| AY126409   | S | <i>Muricea pinnata</i>             |
| AY683066   | M | <i>Muricea pinnata</i>             |
| NC029698.1 | S | <i>Muricea purpurea</i>            |
| KC984586   | D | <i>Muriceides</i> cf. <i>hirta</i> |
| KC984587   | D | <i>Muriceides</i> cf. <i>hirta</i> |
| KC984593   | D | <i>Muriceides</i> cf. <i>hirta</i> |
| KC984600   | D | <i>Muriceides</i> sp2              |
| KC984583   | D | <i>Muriceides</i> sp3              |
| AY126417   | S | <i>Muriceopsis bayeri</i>          |
| AY126416   | S | <i>Muriceopsis flavida</i>         |
| KC788272   | D | <i>Narella pauciflora</i>          |
| KC788269   | M | <i>Nicella</i> sp.                 |
| KC984602   | D | <i>Nidalia dissidens</i>           |
| HG917044   | S | <i>Pacifigorgia bayeri</i>         |
| HG917021   | S | <i>Pacifigorgia cairnsi</i>        |
| HG917041   | S | <i>Pacifigorgia cairnsi</i>        |
| HG917020   | S | <i>Pacifigorgia cathedralensis</i> |
| AY126419   | S | <i>Pacifigorgia elegans</i>        |
| HG917022   | S | <i>Pacifigorgia firma</i>          |
| HG917028   | S | <i>Pacifigorgia firma</i>          |
| HG917029   | S | <i>Pacifigorgia firma</i>          |
| HG917024   | S | <i>Pacifigorgia irene</i>          |
| HG917030   | S | <i>Pacifigorgia irene</i>          |
| HG917031.1 | S | <i>Pacifigorgia irene</i>          |
| GQ342497   | S | <i>Pacifigorgia media</i>          |
| HG917027   | S | <i>Pacifigorgia rubicunda</i>      |
| HG917032   | S | <i>Pacifigorgia rubicunda</i>      |
| HG917033.1 | S | <i>Pacifigorgia rubicunda</i>      |
| KX767343.1 | S | <i>Pacifigorgia sculpta</i>        |
| HG917023   | S | <i>Pacifigorgia smithsoniana</i>   |
| AY126420   | S | <i>Pacifigorgia stenobrochis</i>   |
| HG917018   | S | <i>Pacifigorgia stenobrochis</i>   |
| HG917026   | S | <i>Pacifigorgia stenobrochis</i>   |
| KC788273   | D | <i>Paracalyptrophora carinata</i>  |
| KC788262   | D | <i>Paragorgia johnsoni</i>         |
| KC984606   | D | <i>Paragorgia johnsoni</i>         |
| KC788261   | D | <i>Paragorgia</i> sp1              |
| AY126428.1 | S | <i>Phyllogorgia dilatata</i>       |
| AY126411   | S | <i>Plexaura flexuosa</i>           |
| AY126410   | S | <i>Plexaura homomalla</i>          |
| AY126412   | S | <i>Plexaura kuna</i>               |

|          |   |                                          |
|----------|---|------------------------------------------|
| AY126414 | S | <i>Plexaurella dichotoma</i>             |
| AY683084 | S | <i>Plexaurella fusifera</i>              |
| AY126413 | S | <i>Plexaurella grisea</i>                |
| AY126415 | S | <i>Plexaurella nutans</i>                |
| KC788276 | D | <i>Plumarella</i> sp.                    |
| HG917043 | S | <i>Psammogorgia</i> cf. <i>arbuscula</i> |
| AY126401 | S | <i>Pseudoplexaura crucis</i>             |
| AY683062 | S | <i>Pseudoplexaura porosa</i>             |
| GQ342524 | S | <i>Pseudoplexaura wagnaari</i>           |
| AY126421 | S | <i>Pseudopterogorgia acerosa</i>         |
| AY126423 | S | <i>Pseudopterogorgia americana</i>       |
| AY126422 | S | <i>Pseudopterogorgia elisabethae</i>     |
| AY126403 | S | <i>Pterogorgia anceps</i>                |
| AY126402 | S | <i>Pterogorgia citrina</i>               |
| KC984590 | M | <i>Scleracis guadalupensis</i>           |
| KC984579 | D | <i>Scleraxonia</i> sp.                   |
| KC984605 | D | <i>Sibogagorgia cauliflora</i>           |
| KC984585 | D | <i>Stolonifera</i> sp1                   |
| KC984591 | D | <i>Swiftia casta</i>                     |
| KC984582 | M | <i>Swiftia exserta</i>                   |
| KC984596 | P | <i>Swiftia koreni</i>                    |
| KC984598 | D | <i>Swiftia pallida</i>                   |
